# Supplementary material
Source: PubMed Central journal article supplement (PMC3259770)
Supplement: supp_M801480200_JBC_M8_01480-Supplemental-Final-Correction.pdf [file supp_M801480200_JBC_M8_01480-Supplemental-Final-Correction.pdf]

# Supplemental Figure 1.

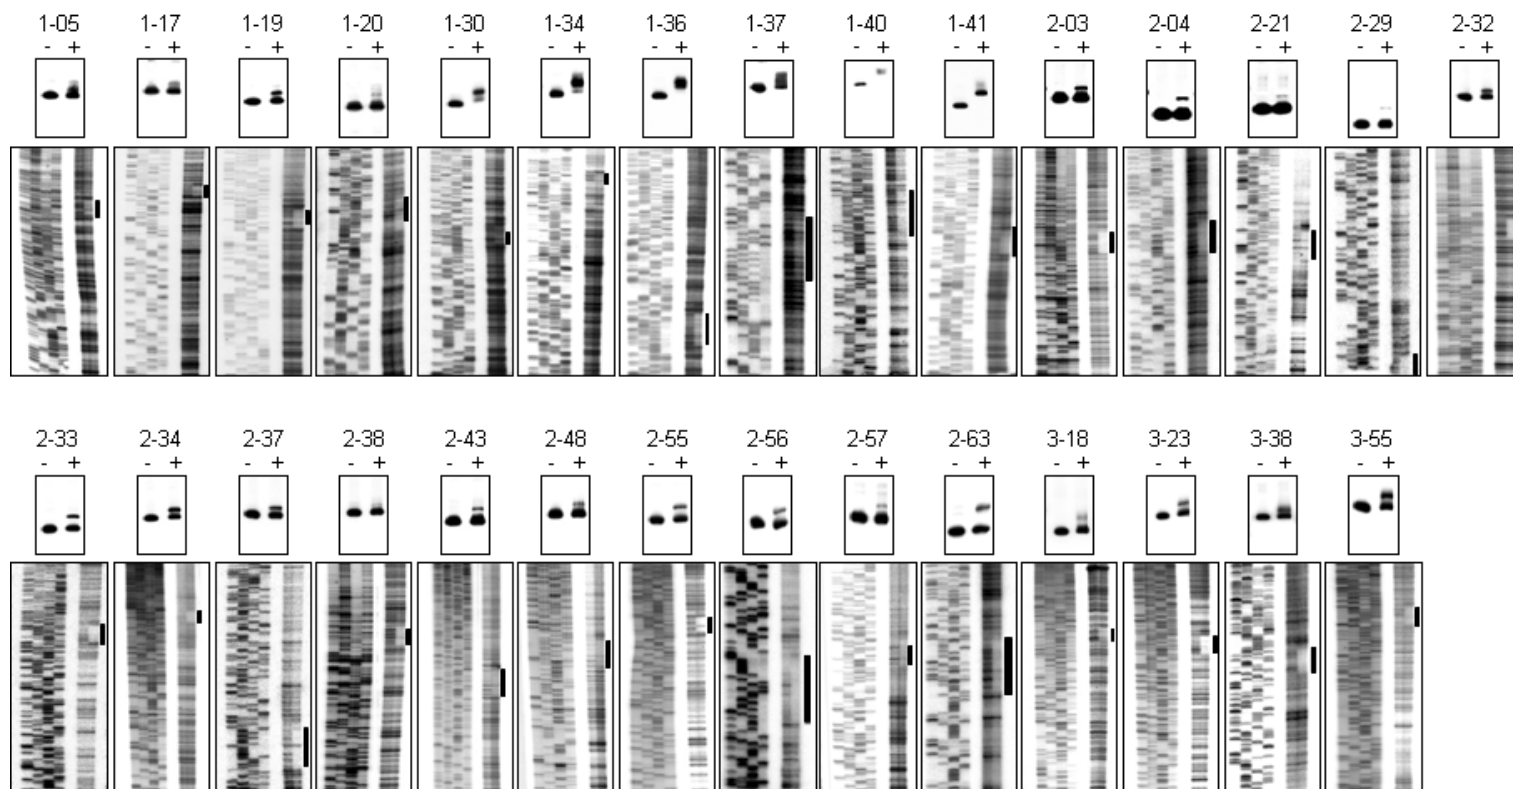

**Supplemental Figure 1.** EMSA for binding of SmcR to *V. vulnificus* genomic DNA fragments and determination of SmcR-binding sequences. Each of the 29 radiolabeled DNA fragments (about 30 ng for each) was mixed with 200 nM of SmcR and then resolved on a 4% polyacrylamide gel. EMSAs were performed in the presence of 0.1  $\mu$ g of poly(dI-dC) as a nonspecific competitor. The same labeled DNA fragments were incubated with 400 nM of SmcR and then digested with DNase I. Protection by SmcR is indicated by filled bars. For each panel, lanes G, A, T, and C (from the left) represent the nucleotide sequencing ladders of the individual clones containing the DNA fragments that were gel-shifted. Details are in the text. -, without SmcR; +, with SmcR. Same isolate numbers appeared in Fig. 2A are on the top of each panel.

**Supplemental TABLE 1. Genes and their products of the *V. vulnificus* SmcR regulon identified using the consensus SmcR-binding sequence\***

| Functional Category                   | Locus tag                        | Gene           | Product                                                                   |
|---------------------------------------|----------------------------------|----------------|---------------------------------------------------------------------------|
| Amino acid transport and metabolism   | VV1_1370 <sup>‡</sup>            | — <sup>†</sup> | Acetylornithine deacetylase                                               |
|                                       | <b>VV1_1371</b>                  | —              | N-acetyl-gamma-glutamyl-phosphate reductase                               |
|                                       | <b>VV1_1372</b>                  | —              | Acetylglutamate kinase                                                    |
|                                       | <b>VV1_1373</b>                  | —              | Argininosuccinate synthase                                                |
|                                       | <b>VV1_1374</b>                  | —              | Argininosuccinate lyase                                                   |
| Carbohydrate transport and metabolism | VV2_1326                         | —              | ABC-type sugar transport system, periplasmic component                    |
| Cell motility                         | <b>VV1_1950<sup>‡</sup></b>      | —              | Flagellar biosynthesis protein                                            |
|                                       | <b>VV1_1951</b>                  | —              | Flagellar biosynthesis MinD-related protein                               |
|                                       | <b>VV1_1952</b>                  | —              | Flagellar biosynthesis sigma factor FliA                                  |
| Cell wall/membrane biogenesis         | VV1_1103                         | —              | Membrane protein                                                          |
|                                       | <b>VV2_0929</b>                  | —              | Membrane-fusion protein                                                   |
|                                       | <b>VV2_0928</b>                  | —              | Cation/multidrug efflux pump                                              |
| Coenzyme transport and metabolism     | VV1_2257                         | —              | 6-pyruvoyl tetrahydrobiopterin synthase                                   |
| Defense mechanisms                    | VV2_1089 <sup>‡</sup>            | —              | ABC-type multidrug transport system, ATPase and permease component        |
| Function unknown                      | VV1_1265                         | —              | Hypothetical protein                                                      |
|                                       | VV1_1471                         | —              | Predicted membrane protein                                                |
|                                       | <b>VV2_0057</b>                  | —              | Hypothetical protein                                                      |
|                                       | <b>VV2_0058</b>                  | —              | Predicted membrane protein                                                |
|                                       | VV2_0279                         | —              | Hypothetical protein                                                      |
|                                       | VV2_0517                         | —              | Hypothetical protein                                                      |
|                                       | VV2_1111                         | —              | Hypothetical protein                                                      |
|                                       | <b>VV2_1541</b>                  | —              | Hypothetical protein                                                      |
|                                       | <b>VV2_1542</b>                  | —              | Transcriptional regulator, MerR family                                    |
|                                       | <b>VV2_1543</b>                  | —              | Deoxyribodipyrimidine photolyase                                          |
|                                       | <b>VV2_1544</b>                  | —              | Hypothetical protein                                                      |
|                                       | General function prediction only | VV1_0300       | —                                                                         |
| <b>VV1_0840</b>                       |                                  | —              | ABC-type transport system, permease component                             |
| <b>VV1_0839</b>                       |                                  | —              | ABC-type oligopeptide transport system, periplasmic component             |
| <b>VV1_0838</b>                       |                                  | —              | ABC-type dipeptide/oligopeptide/nickel transport system, ATPase component |
| <b>VV1_0837</b>                       |                                  | —              | ABC-type oligopeptide transport system, ATPase component                  |
| VV1_1085                              |                                  | —              | Peptide ABC transporter, ATP-binding protein                              |
| <b>VV1_1456</b>                       |                                  | —              | Predicted Zn-dependent protease and their inactivated homologs            |
| <b>VV1_1455</b>                       |                                  | —              | Predicted amidohydrolase                                                  |
| <b>VV1_1454</b>                       |                                  | —              | Predicted membrane protein                                                |
| <b>VV1_1453</b>                       |                                  | —              | Ribonuclease G and E                                                      |

|                                                              |                              |            |                                                                           |
|--------------------------------------------------------------|------------------------------|------------|---------------------------------------------------------------------------|
|                                                              | <b>VV1_1452</b>              | <i>maf</i> | Maf-like protein                                                          |
|                                                              | <b>VV1_1451</b>              | —          | Cell shape-determining protein                                            |
|                                                              | <b>VV1_1450</b>              | —          | Cell shape-determining protein                                            |
|                                                              | VV1_2358                     | —          | Probable hydrolase                                                        |
|                                                              | <b>VV1_2976</b> <sup>‡</sup> | —          | ABC-type uncharacterized transport system, permease component             |
|                                                              | <b>VV1_2975</b>              | —          | ABC-type uncharacterized transport system, permease component             |
|                                                              | <b>VV1_2974</b>              | —          | ABC-type dipeptide transport system, periplasmic component                |
|                                                              | <b>VV1_2973</b>              | —          | ABC-type dipeptide/oligopeptide/nickel transport system, ATPase component |
|                                                              | <b>VV1_2972</b>              | —          | ABC-type oligopeptide transport system, ATPase component                  |
|                                                              | VV2_0856                     | —          | ATPase component of ABC transporter with duplicated ATPase domains        |
|                                                              | VV2_0970                     | —          | Predicted hydrolase/acyltransferase                                       |
|                                                              | VV2_1270                     | —          | Predicted Zn-dependent peptidase                                          |
|                                                              | VV2_1527                     | —          | Predicted acetyltransferase                                               |
| Inorganic ion transport and metabolism                       | <b>VV1_0842</b> <sup>‡</sup> | —          | Outer membrane receptor protein                                           |
|                                                              | <b>VV1_0843</b>              | —          | Hypothetical protein                                                      |
|                                                              | <b>VV1_0844</b>              | —          | TolR                                                                      |
|                                                              | <b>VV1_0845</b>              | —          | TonB system transport protein ExbB2                                       |
|                                                              | VV1_2805                     | —          | Di- and tricarboxylate transporter                                        |
|                                                              | VV2_1106                     | —          | Arylsulfatase A                                                           |
| Intracellular trafficking and secretion                      | VV1_3112                     | —          | Multiple antibiotic transporter                                           |
| Nucleotide transport and metabolism                          | VV1_0302                     | —          | DNA/RNA endonuclease G                                                    |
|                                                              | <b>VV1_1635</b>              | —          | Hypoxanthine phosphoribosyltransferase                                    |
|                                                              | <b>VV1_1636</b>              | —          | Hypoxanthine phosphoribosyltransferase                                    |
| Posttranslational modification, protein turnover, chaperones | VV1_0453                     | —          | Peroxiredoxin                                                             |
|                                                              | VV2_0020 <sup>‡</sup>        | —          | Molecular chaperone                                                       |
|                                                              | VV2_1650                     | —          | Predicted redox protein, regulator of disulfide bond formation            |
| Replication, recombination and repair                        | VV1_1702                     | —          | Superfamily II DNA helicase                                               |
|                                                              | VV2_1406 <sup>‡</sup>        | —          | Endonuclease I                                                            |
|                                                              | VV2_1643                     | —          | Alkylated DNA repair protein                                              |
| Signal transduction mechanisms                               | VV1_1489                     | —          | HD-GYP domain                                                             |
|                                                              | VV1_1931                     | —          | FlaK protein                                                              |
|                                                              | VV1_2096 <sup>‡</sup>        | —          | Methyl-accepting chemotaxis protein                                       |
|                                                              | VV1_2211                     | —          | Hypothetical protein                                                      |
|                                                              | <b>VV1_2868</b>              | —          | Methyl-accepting chemotaxis protein                                       |
|                                                              | <b>VV1_2867</b>              | —          | Pseudouridylate synthase, 23S RNA-specific                                |
|                                                              | <b>VV1_2866</b>              | —          | Predicted SAM-dependent methyltransferase                                 |
|                                                              | VV1_2911                     | —          | Predicted signal transduction protein                                     |
|                                                              | VV2_0528                     | —          | Methyl-accepting chemotaxis protein                                       |
|                                                              | VV2_0823                     | —          | ABC-type amino acid transport/signal transduction systems                 |
|                                                              | VV2_0825                     | —          | Methyl-accepting chemotaxis protein                                       |

|               |                       |                      |                                                                            |
|---------------|-----------------------|----------------------|----------------------------------------------------------------------------|
| Transcription | <b>VV1_0829</b>       | <i>slmA</i>          | Nucleoid occlusion protein                                                 |
|               | <b>VV1_0830</b>       | —                    | Lipid A biosynthesis lauroyl acyltransferase                               |
|               | VV1_1687              | <i>greA</i>          | Transcription elongation factor GreA                                       |
|               | VV2_0446              | —                    | Serine/threonine protein kinase                                            |
|               | VV2_0981              | —                    | Response regulator                                                         |
|               | VV2_1391 <sup>†</sup> | —                    | Transcriptional regulator                                                  |
| Translation   | <b>VV1_1270</b>       | —                    | Lysyl-tRNA synthetase                                                      |
|               | <b>VV1_1271</b>       | —                    | Hypothetical protein                                                       |
|               | VV1_2397              | —                    | Threonyl-tRNA synthetase                                                   |
|               | VV1_3016              | —                    | Ribosomal large subunit pseudouridine synthase C                           |
| Not in COGs   | VV1_0464              | —                    | Polyphosphate kinase                                                       |
|               | VV1_0522              | —                    | Hypothetical protein                                                       |
|               | VV1_0644              | —                    | Pyruvate kinase                                                            |
|               | <b>VV1_1215</b>       | —                    | Hypothetical protein                                                       |
|               | <b>VV1_1216</b>       | —                    | Hypothetical protein                                                       |
|               | VV1_1401              | —                    | Thymidylate kinase                                                         |
|               | <b>VV1_1472</b>       | —                    | Predicted membrane protein                                                 |
|               | <b>VV1_1473</b>       | —                    | Zn-dependent protease with chaperone function                              |
|               | VV1_1720              | —                    | GGDEF family protein                                                       |
|               | VV1_2362              | —                    | Hypothetical protein                                                       |
|               | VV1_2380              | —                    | Hypothetical protein                                                       |
|               | VV1_2430              | —                    | Coenzyme F420-dependent N5,N10-methylene tetrahydromethanopterin reductase |
|               | VV1_2726              | —                    | Histone acetyltransferase HPA2                                             |
|               | <b>VV1_2957</b>       | —                    | Hypothetical protein                                                       |
|               | <b>VV1_2958</b>       | —                    | ISSod7                                                                     |
|               | VV2_0067              | —                    | Hypothetical protein                                                       |
|               | VV2_0133              | —                    | Decaheme cytochrome c related protein                                      |
|               | VV2_0250 <sup>†</sup> | —                    | Zn-dependent protease                                                      |
|               | <b>VV2_0364</b>       | —                    | Chromosome segregation ATPase                                              |
|               | <b>VV2_0363</b>       | —                    | Biopolymer transport protein                                               |
|               | <b>VV2_0362</b>       | —                    | Biopolymer transport protein                                               |
|               | <b>VV2_0361</b>       | —                    | Biopolymer transport protein                                               |
|               | <b>VV2_0360</b>       | —                    | Periplasmic protein TonB                                                   |
|               | <b>VV2_0359</b>       | —                    | FOG: TPR repeat protein                                                    |
|               | VV2_0400              | —                    | Glycosidase                                                                |
|               | VV2_0414              | —                    | Succinyl-CoA synthetase, alpha subunit                                     |
|               | VV2_0429              | —                    | Hemolysin-coregulated protein                                              |
|               | VV2_0658              | —                    | Hypothetical protein                                                       |
|               | VV2_1035              | —                    | Uncharacterized ABC-type transport system, permease component              |
|               | VV2_1046              | —                    | AraC-type DNA-binding domain-containing protein                            |
|               | VV2_1147              | —                    | Hypothetical protein                                                       |
|               | VV2_1179              | —                    | Hypothetical protein                                                       |
|               | VV2_1201              | —                    | Hypothetical protein                                                       |
| VV2_1281      | —                     | Maltoporin           |                                                                            |
| VV2_1371      | —                     | Hypothetical protein |                                                                            |
| VV2_1398      | —                     | Hypothetical protein |                                                                            |

\*Functional categories, gene names, locus tag numbers, and annotation of gene products are based on the database of the *V. vulnificus* CMCP6 genome. Locus tags likely in an operon are indicated in boldface.

<sup>†</sup>Locus tags without gene name.

‡Binding of SmcR to their upstream region was experimentally verified by EMSA.

§Clusters of orthologous group.

**Supplemental TABLE 2. Oligonucleotides used for EMSA, ChIP, and quantitative RT-PCR analysis of the ten genes randomly selected from the pool of the newly predicted SmcR-regulon**

| Locus tag*                 | Oligonucleotide sequence, 5'-3' |                           |
|----------------------------|---------------------------------|---------------------------|
|                            | Forward                         | Reverse                   |
| <b>EMSA and ChIP assay</b> |                                 |                           |
| VV1_0842                   | AGATCCACCCTCCAACACATACC         | GAACGACGACCAAATGTGACG     |
| VV1_1370                   | ACTTCCCCTGTTGACAGTTGGG          | AGTTGAGAAATGCACTTGCCCG    |
| VV1_1950                   | AGCAGTCTTACTCACCTCCGGC          | GACATGATGACAGCATCAACGC    |
| VV1_2096                   | GACCCGTTGTTGTCATGTCTAGC         | ACGTTTCTGAGAGAGCGCAAGC    |
| VV1_2976                   | TAATGCCAAGAAACGTCGGC            | CCACACTTTCATACGTTTTACCG   |
| VV2_0020                   | ACTTGCCATTTGGATTGCTCC           | CGTGGCAATCAATAAACACCG     |
| VV2_0250                   | CCTCCTAGGGTGTGTGATTGTGG         | AACAGATAGCAGCTATTTCCCC    |
| VV2_1089                   | ACCACACAGTCTGCATTTTGGG          | CCAGTTGGTTATCACTTTGCGG    |
| VV2_1391                   | CTGTGCCAATTGCTCAGATCG           | GTTCTGCAATAGCCACAAAGGC    |
| VV2_1406                   | AATCGCCATTGAGTAGCTGTGC          | CTCAAACACCACAAAACACCCG    |
| <b>Quantitative RT-PCR</b> |                                 |                           |
| VV1_0842                   | TCGCAGAAGAGCAGCAAGTCG           | TGGTAATGACGGTGACAGGAGAAG  |
| VV1_1370                   | GCTATCCCATCTCCCCTCTTAACC        | CCCACGCAACAGATTATCCAAACC  |
| VV1_1950                   | ACCGCCGTAAGCCTCAAACCTG          | TCCTGCCACAATAAACCCGATACC  |
| VV1_2096                   | CTCGGCGGCTGGACACATC             | GCACGGGCGGCTTCTATGG       |
| VV1_2976                   | CCTTTCCGAAGATCAAATGGCAGAG       | GACAAGAAGACGAGTCAACCAATCC |
| VV2_0020                   | AAGATGTGGTGTGGTCAAGCG           | GTGCCGAATGTTCTGCGTTGG     |
| VV2_0250                   | ATACCCGTTGGCAGGATGTGG           | AAAGCCTCGCCCGTCAGC        |
| VV2_1089                   | TCCAGATGCCAGTGAAGAAGAGC         | GCCAAACGGGTCGGTGAGG       |
| VV2_1391                   | GAACAAGGCAGTTTGTCTGGCG          | ATCCGTGAGACTTTGTTTGCGG    |
| VV2_1406                   | GGCACACAAGGCAACACTGAC           | CACCGACACCGAGAAGTATAGG    |

\*Locus tag numbers are based on the database of the *V. vulnificus* CMCP6 genome which was retrieved from GenBank (AE016795; AE016796).
